# Supplementary material for: Using imidazolium-based ionic liquids as dual solvent-catalysts for sustainable synthesis of vitamin esters: inspiration from bio- and organo-catalysis
Source: Royal Society of Chemistry journal article supplement (doi:10.1039/c5gc02557e), 2015-12-09
Supplement: c5gc02557e1.pdf [file c5gc02557e1.pdf]

## ***Supporting information***

### **Using Imidazolium-Based Ionic Liquids as Dual Solvent-Catalysts for Sustainable Synthesis of Vitamin Esters: Inspiration from Bio- and Organo-Catalysis**

Yifeng Tao<sup>a, ‡</sup>, Ruijuan Dong<sup>a, b, ‡</sup>, Ioannis V. Pavlidis<sup>c</sup>, Biqiang Chen<sup>a, \*</sup>, Tianwei Tan<sup>a, \*</sup>

<sup>a</sup> National Energy R&D Center for Biorefinery, Beijing Key Lab of Bioprocess, Beijing University of Chemical Technology, No. 15 North 3rd Ring Rd East, 100029 Beijing, PR China. B. Chen (Tel.: +86-10-64416691; Email: chenbq@mail.buct.edu.cn); T. Tan (Email: twtan@mail.buct.edu.cn)

<sup>b</sup> School of Basic Medical Science, Beijing University of Chinese Medicine, No. 11 North 3rd Ring Rd East, 100029 Beijing, PR China.

<sup>c</sup> Dept. of Biochemistry, University of Kassel, Heinrich-Plett-Str. 40, 34132 Kassel, Germany.

<sup>‡</sup>These authors contributed equally.

#### **Contents**

|                                                            |      |
|------------------------------------------------------------|------|
| Table S1 and S2 .....                                      | SI_2 |
| Table S3.....                                              | SI_3 |
| Scheme S1 .....                                            | SI_4 |
| HRMS spectra of vitamin C and A esters .....               | SI_5 |
| Fig. S4 .....                                              | SI_7 |
| HRMS, 1H- and 13C-NMR spectra of vitamin E succinate ..... | SI_9 |

**Table S1** Effects of organic solvents on the esterification of vitamin E with succinic anhydride using *Candida sp.* Lipase as catalysts

| Solvents                  | Yields/% |
|---------------------------|----------|
| Hexane                    | 0        |
| <i>tert</i> -Amyl alcohol | 0.5      |
| <i>Tert</i> -Butanol      | 1.6      |
| Acetonitrile              | 0.8      |
| Dichloromethane           | 3.2±0.2  |
| DMSO                      | 72.6±1.8 |
| DMF                       | 54.5±0.9 |

**Table S2** Effects of molar ratio among substrates and ionic liquids on the initial rate and yield when using [C<sub>5</sub>C<sub>1</sub>Im][NO<sup>-</sup> 3] as catalyst for the esterification of vitamin E with succinic anhydride

| Entry      | Molar Ratio<br>( $\alpha$ -tocopherol: Succinic Anhydride: ILs) | Initial rate<br>(10 <sup>-2</sup> /min) | Yield after<br>1.5 h (%) |
|------------|-----------------------------------------------------------------|-----------------------------------------|--------------------------|
| <b>S1</b>  | 0.5: 1: 4                                                       | 0.70 ±0.01                              | 96.2 ±1.2                |
| <b>S2</b>  | 1.0: 2: 4                                                       | 1.51 ±0.08                              | 97.2 ±1.4                |
| <b>S3</b>  | 1.5: 3: 4                                                       | 2.22 ±0.07                              | 96.5 ±1.2                |
| <b>S4</b>  | 2.0: 4: 4                                                       | 2.69 ±0.09                              | 95.2 ±0.8                |
| <b>S5</b>  | 4.0: 8: 4                                                       | 2.86 ±0.12                              | 76.4 ±2.1                |
| <b>S6</b>  | 0.5: 0.55: 4                                                    | 0.42 ±0.04                              | 76.8 ±2.4                |
| <b>S7</b>  | 0.5: 0.75: 4                                                    | 0.61 ±0.05                              | 89.1 ±2.2                |
| <b>S8</b>  | 0.5: 1.00: 4                                                    | 0.69 ±0.03                              | 96.2 ±1.8                |
| <b>S9</b>  | 0.5: 1.50: 4                                                    | 0.88 ±0.06                              | 98.9 ±1.6                |
| <b>S10</b> | 0.5: 2.00: 4                                                    | 1.01 ±0.09                              | 99.5 ±1.3                |

**Table S3** Synthesis of vitamin esters using [C5C1Im][NO<sub>3</sub>] ionic liquid as dual solvent catalysts

| Vitamins<br>Acyl donor | Vitamin E                                                                         | Vitamin A                                                                          | Vitamin C                                                                           |
|------------------------|-----------------------------------------------------------------------------------|------------------------------------------------------------------------------------|-------------------------------------------------------------------------------------|
|                        | 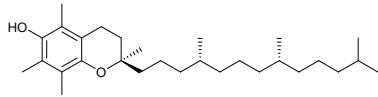 |  |  |
| Acetic anhydride       | +                                                                                 | +                                                                                  | +                                                                                   |
| Succinate              | —                                                                                 | —                                                                                  | —                                                                                   |
| Butyric anhydride      | +                                                                                 | +                                                                                  | +                                                                                   |
| Succinic anhydride     | +                                                                                 | +                                                                                  | +                                                                                   |
| Ketoglutarate          | —                                                                                 | —                                                                                  | —                                                                                   |
| Pentyl anhydride       | +                                                                                 | +                                                                                  | +                                                                                   |
| Glutaric anhydride     | +                                                                                 | +                                                                                  | +                                                                                   |

Conditions: A standard mixture containing 0.5 mmol vitamin, 1 mmol acyl donor and 4 mM ionic liquids was used and the reactions were carried out at 50 °C for 3 h under dark and nitrogen atmosphere.

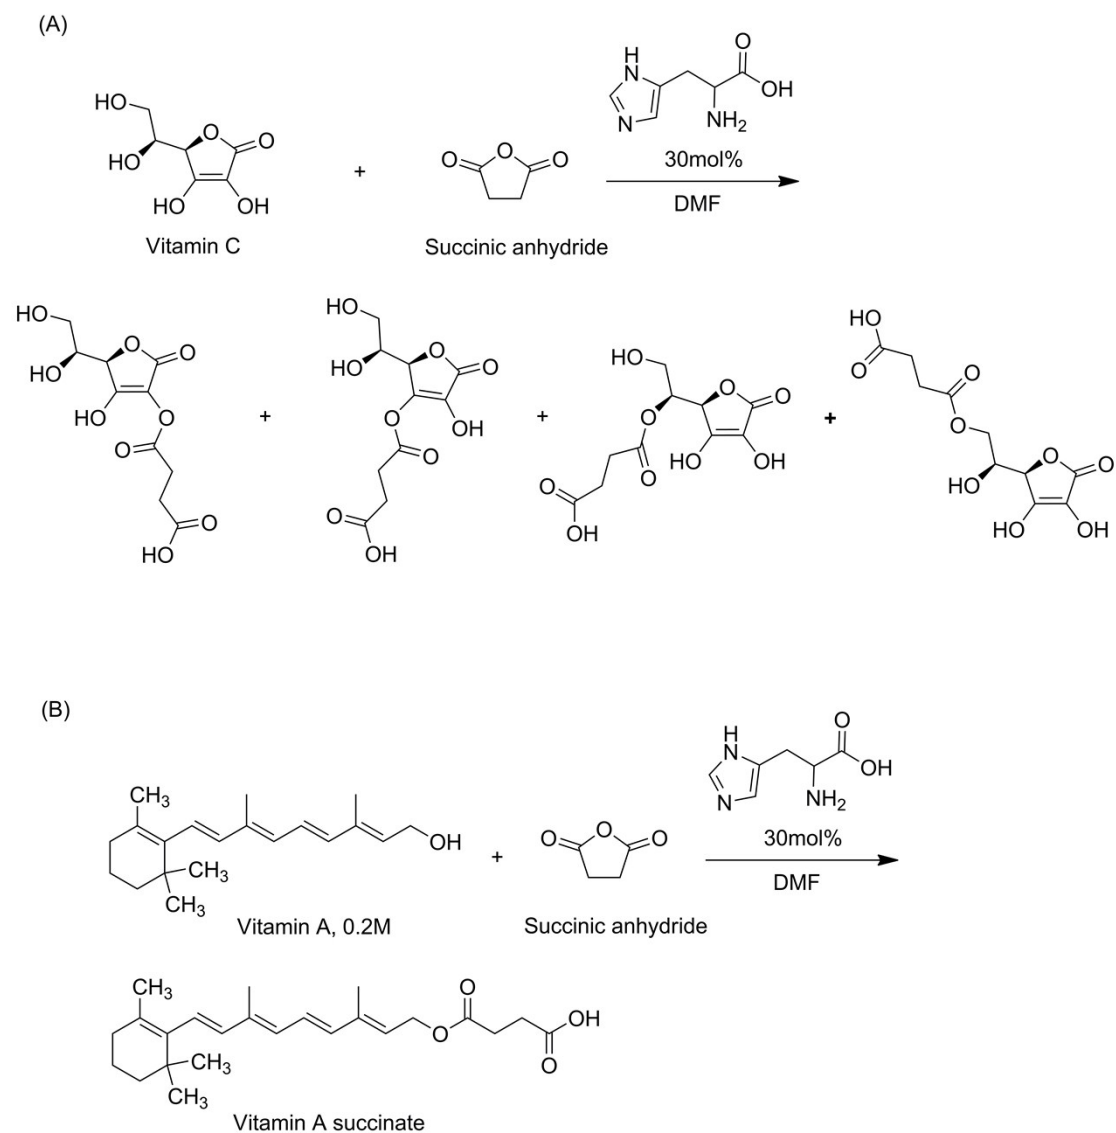

**Scheme S1** Histidine-catalyzed esterification of (A) vitamin C and (B) vitamin A with succinic anhydride. The products were characterized by LC-MS.

## HRMS spectra of vitamin C and A succinate

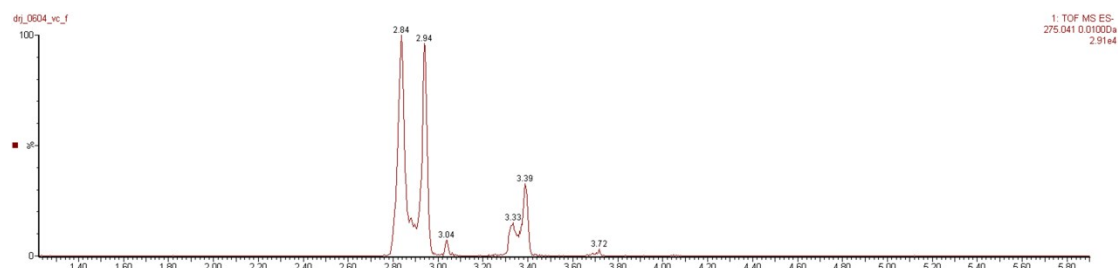

**Fig. S1** LC-MS spectrum of esterification between vitamin C and succinic anhydride.  $m/z$  of four peaks (retention time: 2.84 min, 2.94 min, 3.33 min and 3.39 min) were found 277.0559  $[M]^+$ , indicating four hydroxyl group of vitamin C can be esterified with succinic anhydride.

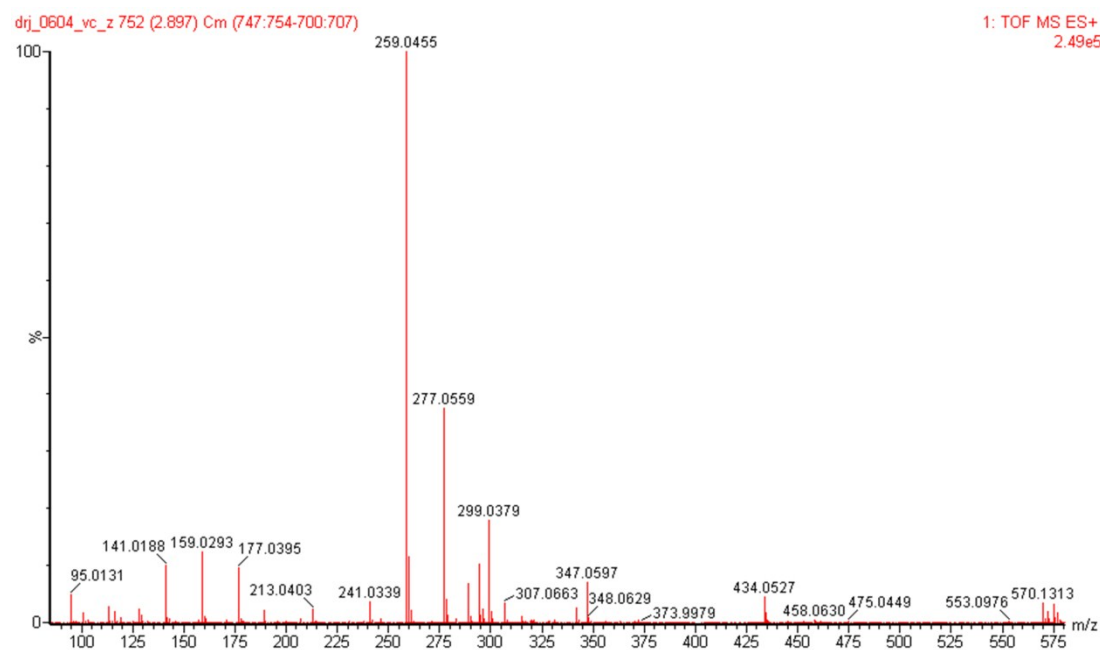

**Fig. S2** HRMS spectrum of vitamin C succinate (EI,  $m/z$ : found 277.0559  $[M]^+$ ; calculated 276.05 for  $C_{10}H_{12}O_9$ )

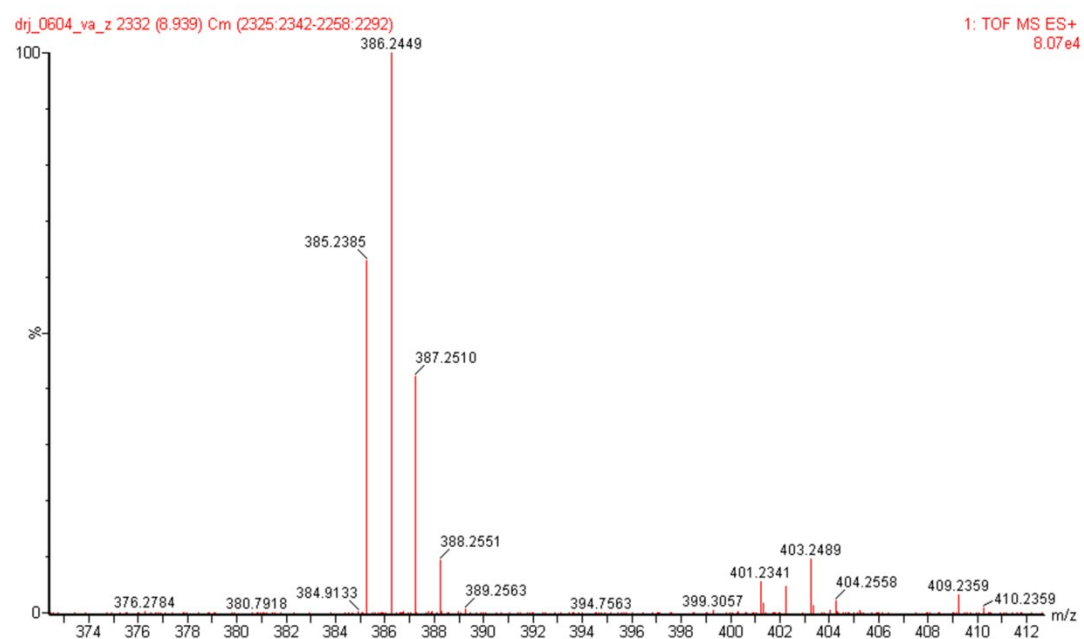

**Fig. S3** HRMS spectrum of vitamin A succinate (EI, m/z: found 386.2449 [M]<sup>+</sup>; calculated 386.25 for C<sub>24</sub>H<sub>34</sub>O<sub>4</sub>)

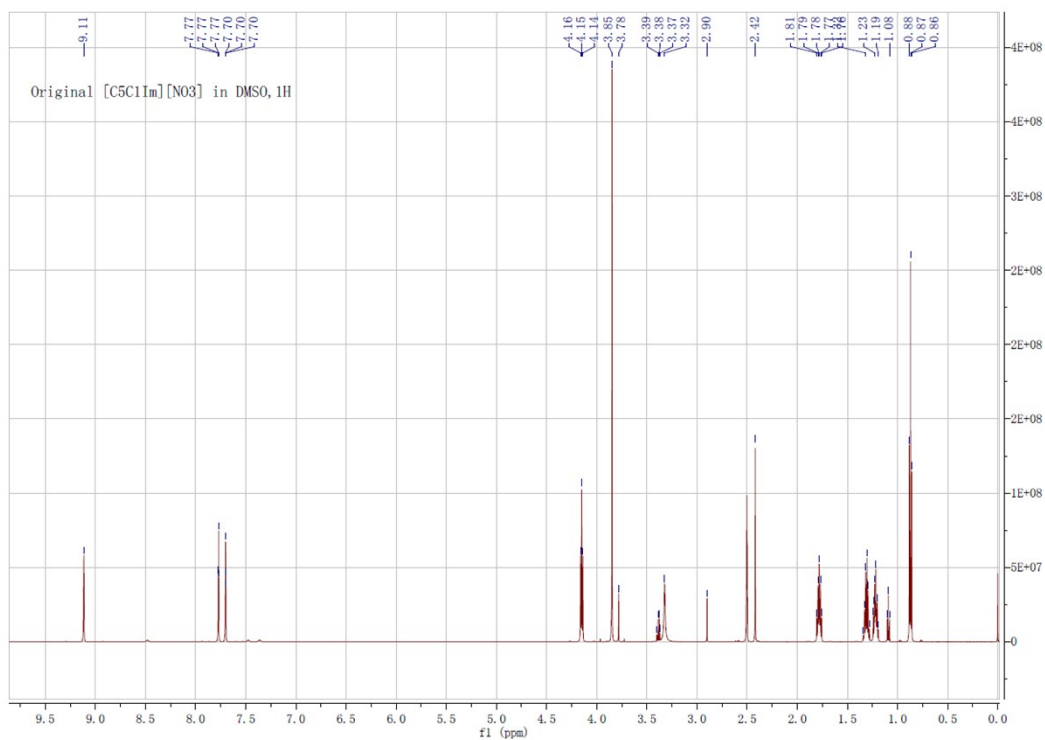

(a)  $^1\text{H}$  NMR of original  $[\text{C}_5\text{C}_1\text{Im}][\text{NO}-3]$

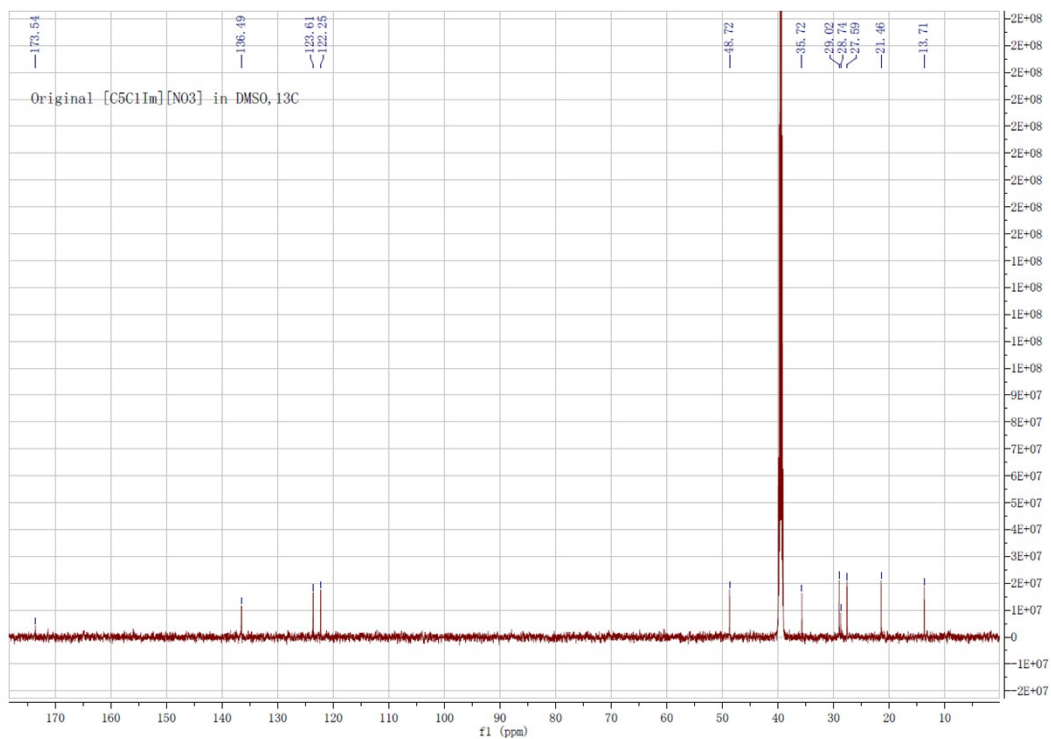

(b)  $^{13}\text{C}$  NMR of original  $[\text{C}_5\text{C}_1\text{Im}][\text{NO}-3]$

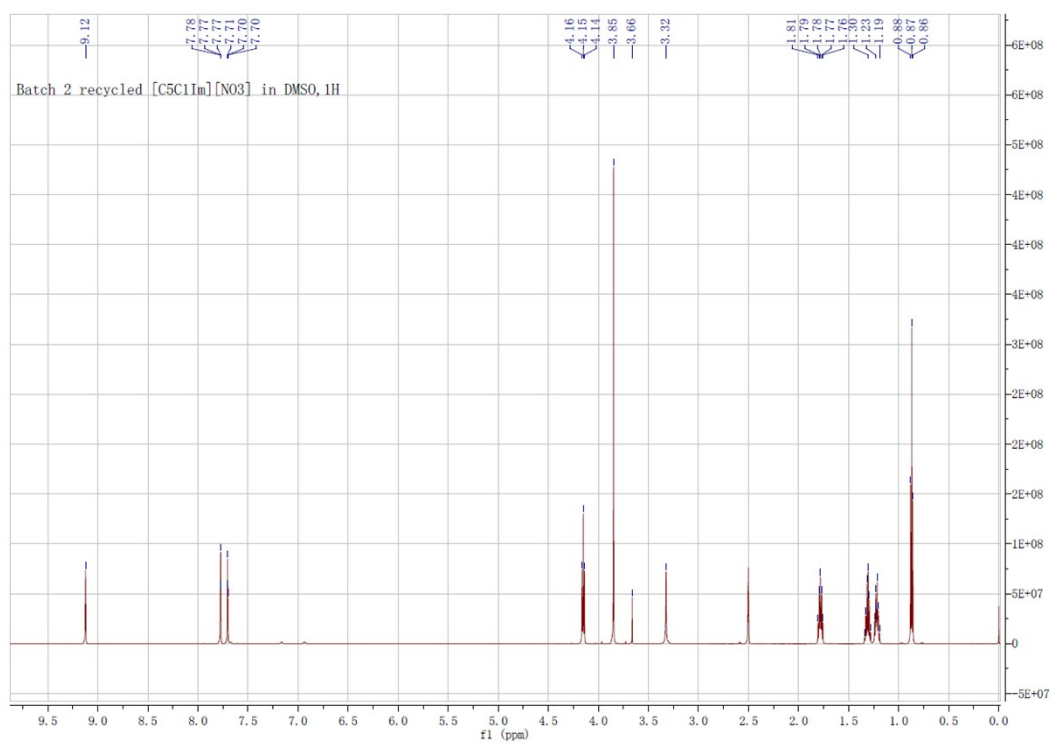

(c)  $^1H$  NMR of batch 2 recycled  $[C_5C_1Im][NO-3]$

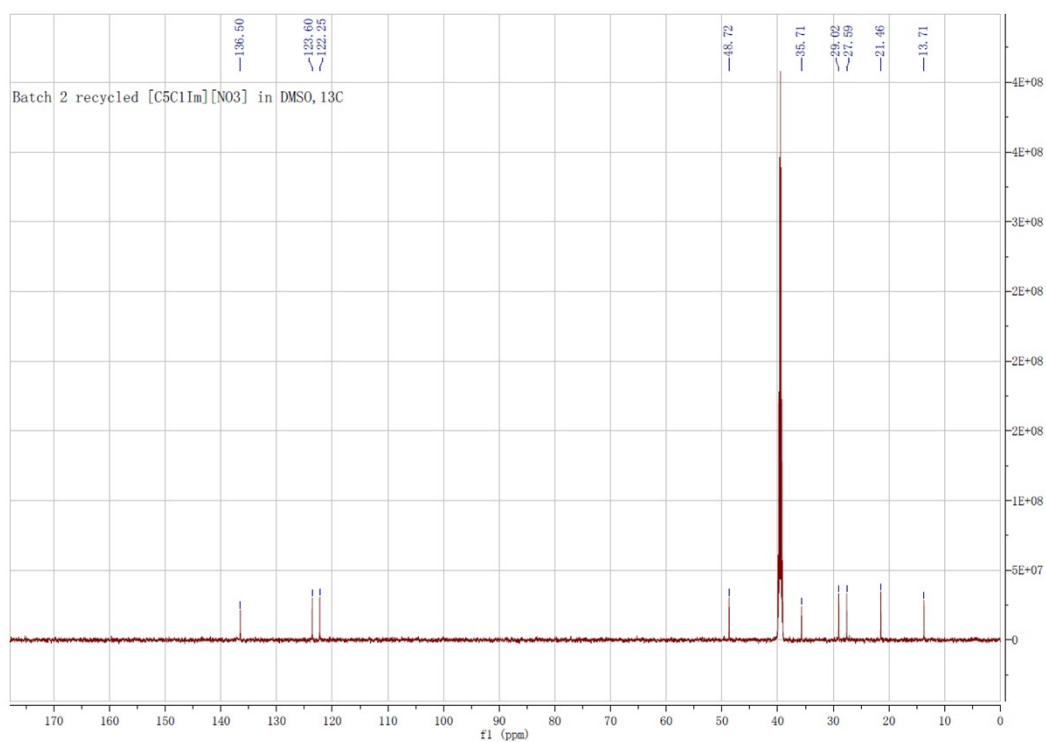

(d)  $^{13}C$  NMR of batch 2 recycled  $[C_5C_1Im][NO-3]$

**Fig. S4** Structural comparison between the recovered and original  $[C_5C_1Im][NO-3]$  ionic liquid by the test of  $^1H$  and  $^{13}C$  NMR (600 HZ, in DMSO- $d_6$ )



## HRMS, $^1\text{H}$ - and $^{13}\text{C}$ -NMR spectra of vitamin E succinate

**Purification of vitamin E succinate:** (a) 1 mL of the reaction medium was added to 2 mL diethyl ether and incubated overnight under  $-18\text{ }^\circ\text{C}$ ; (b) after centrifugation at  $8000 \times g$  for 2 min, the organic phase was removed and added to 1.5 mL deionized water, and then mixed by vortex for 1 min; (c) after centrifugation at  $8000 \times g$  for 2 min, the organic phase was carefully transferred into a new tube and then dried with  $\text{Na}_2\text{SO}_4$ ; (d) after the removal of solvent in a reduced-pressure rotary evaporator, 400  $\mu\text{L}$  *n*-hexane were added to dissolve the unreacted VE further purification of the final isolated ester because  $\alpha$ -tocopherol succinate is not soluble in *n*-hexane; (e) Centrifuging at  $8000 \times g$  for 2 min again, the liquid was discarded and after dried by nitrogen, white powder was obtained for further characterization. The isolated yield was about 80%, and the purity of final product vitamin E succinate was 97%; the melting point of final product was  $75.2\text{--}76.5\text{ }^\circ\text{C}$ .

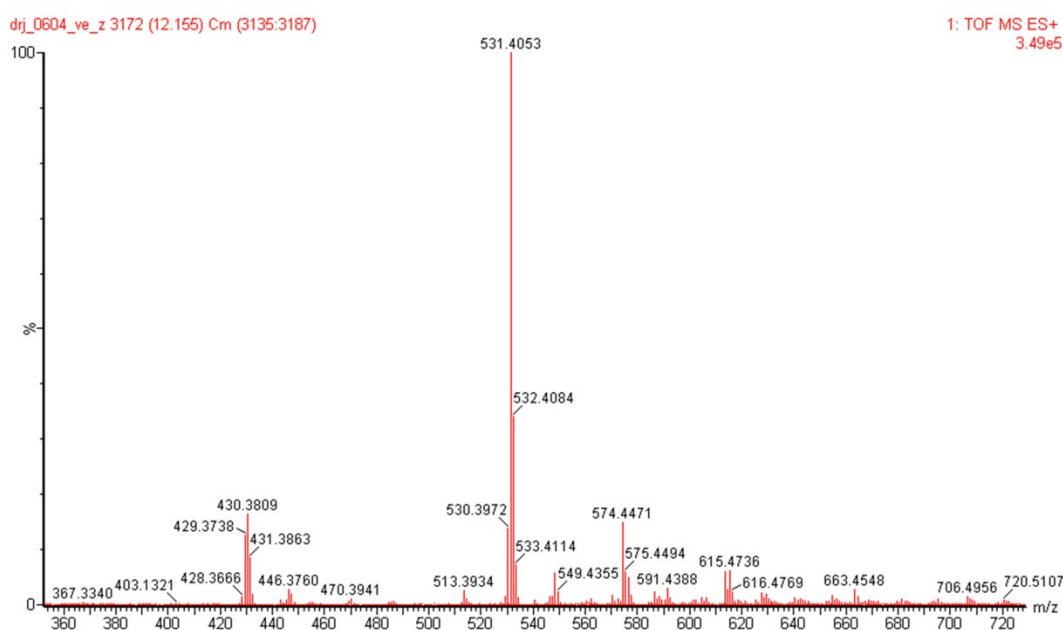

**Fig. S5** HRMS spectrum of vitamin E succinate (EI,  $m/z$ : found 531.4053  $[\text{M}]^+$ ; calculated 530.40 for  $\text{C}_{33}\text{H}_{54}\text{O}_5$ ).

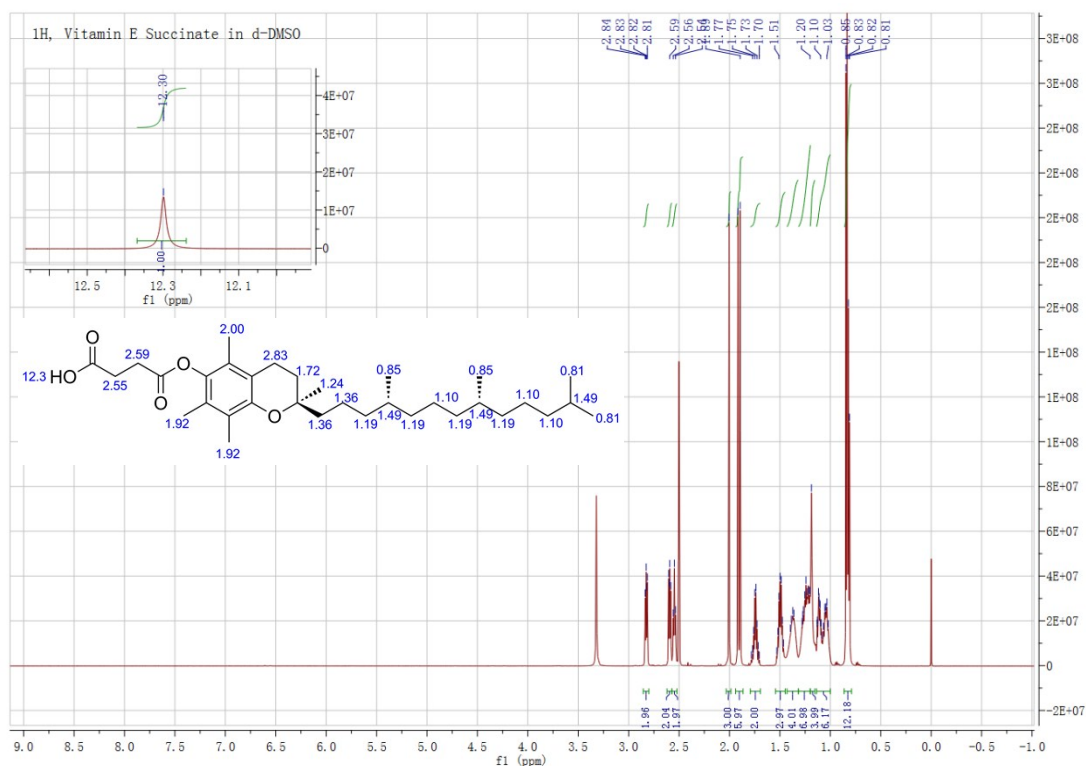

**Fig. S6**  $^1\text{H}$ -NMR spectrum of vitamin E succinate (600HZ, d<sub>6</sub>-DMSO)

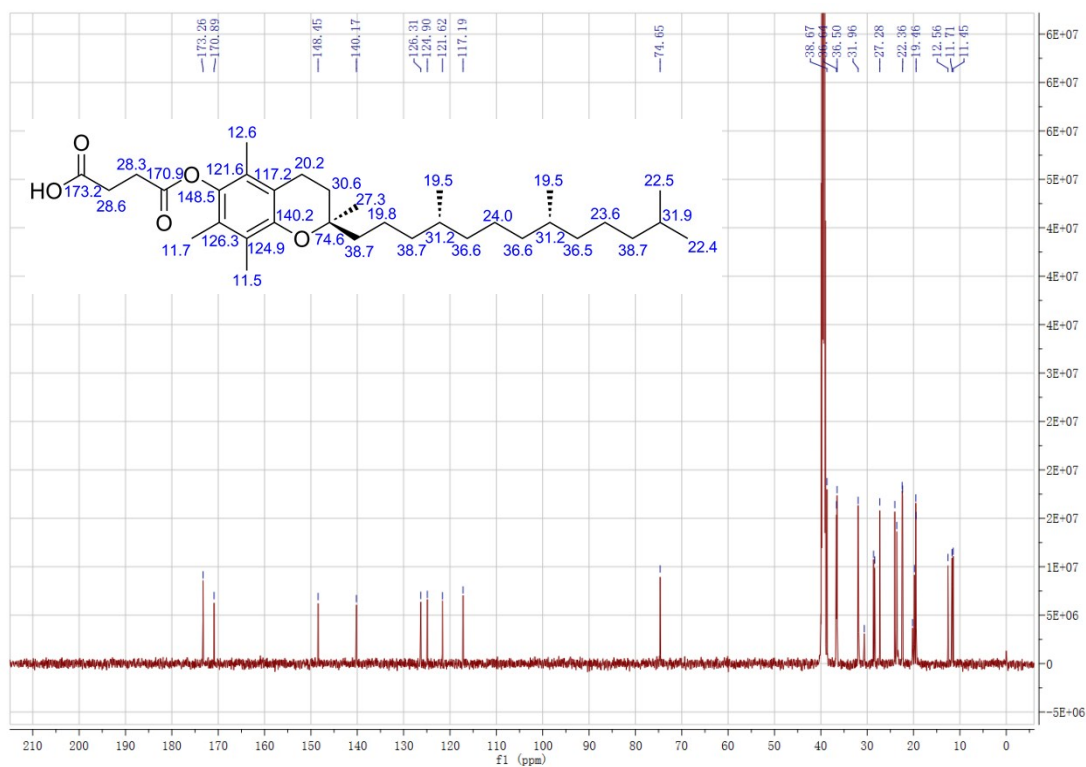

**Fig. S7**  $^{13}\text{C}$ -NMR spectrum of vitamin E succinate (600HZ, d<sub>6</sub>-DMSO)

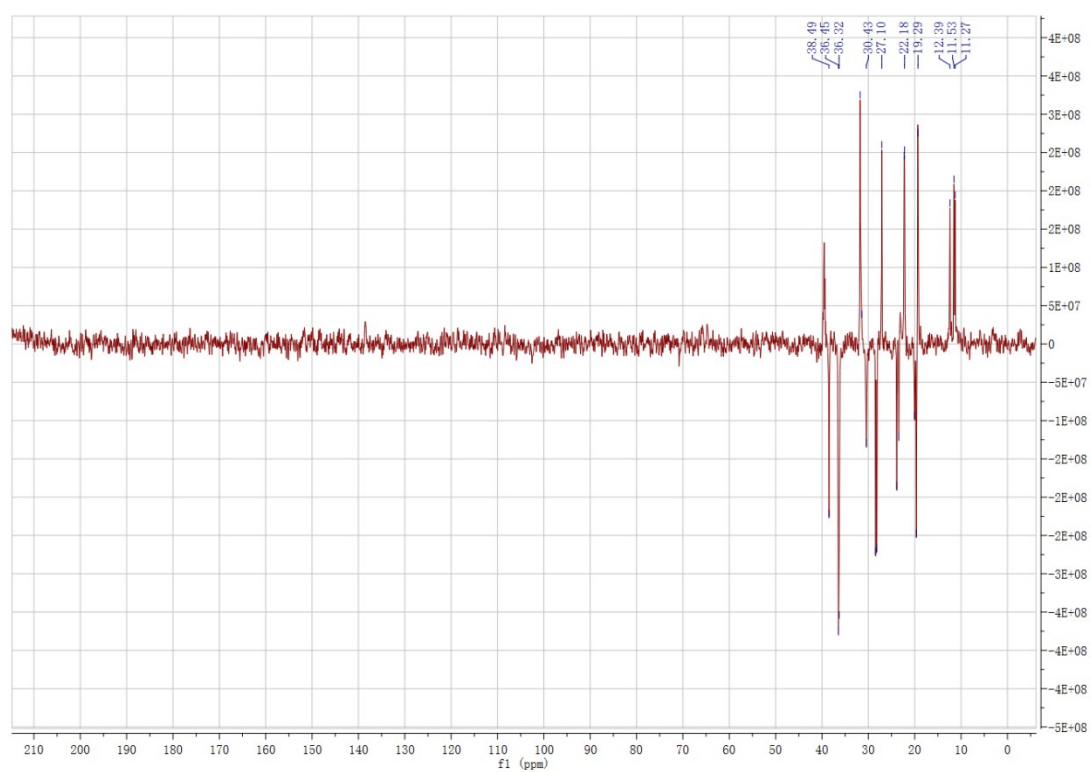

**Fig. S8**  $^{13}\text{C}$ -DEPT ( $0135^\circ$ )-NMR spectrum of vitamin E succinate (600HZ,  $\text{d}_6$ -DMSO)
